# Supplementary material for: Microbiome-Metabolites Analysis Reveals Unhealthy Alterations in the Gut Microbiota but Improved Meat Quality with a High-Rice Diet Challenge in a Small Ruminant Model
Source: MDPI journal article supplement (doi:10.3390/ani11082306), 2021-08-05
Supplement: s1 [file s1]

**Table S1.** Ingredients and nutrient levels of the experimental diets (air-dried basis) <sup>a</sup>

| Item                                                | Con  | HR   |
|-----------------------------------------------------|------|------|
| Rice straw                                          | 45.0 | 10.0 |
| Rice with shell                                     | 33.2 | 54.3 |
| Soybean meal                                        | 9.60 | 15.7 |
| Wheat bran                                          | 6.00 | 9.80 |
| Fat powder                                          | 3.20 | 5.20 |
| Calcium carbonate                                   | 0.50 | 0.80 |
| Calcium bicarbonate                                 | 1.10 | 1.80 |
| Sodium chloride                                     | 0.60 | 1.00 |
| Premix <sup>b</sup>                                 | 1.00 | 1.40 |
| Nutrient levels <sup>4</sup> , % of DM (dry matter) |      |      |
| Crude protein                                       | 13.5 | 17.6 |
| Crude ash                                           | 9.34 | 9.12 |
| Crude fat                                           | 4.18 | 6.01 |
| Neutral detergent                                   | 49.8 | 38.4 |
| Acid detergent fiber                                | 36.5 | 9.51 |

<sup>a</sup>Con: control diet; HR: high rice diet; <sup>b</sup>Premix composition per kg diet: 68 mg FeSO<sub>4</sub>·H<sub>2</sub>O, 44 mg CuSO<sub>4</sub>·5H<sub>2</sub>O, 411 µg CoCl<sub>2</sub>·6H<sub>2</sub>O, 1.70 mg KIO<sub>3</sub>, 211 mg MnSO<sub>4</sub>·H<sub>2</sub>O, 126 mg ZnSO<sub>4</sub>·H<sub>2</sub>O, 56 µg Na<sub>2</sub>SeO<sub>3</sub>, 462 mg MgSO<sub>4</sub>·7H<sub>2</sub>O, 737 IU vitamin A, 8.29 mg vitamin E, 5.1 g carrier zeolite powder; <sup>4</sup>Nutrient levels were measured values.

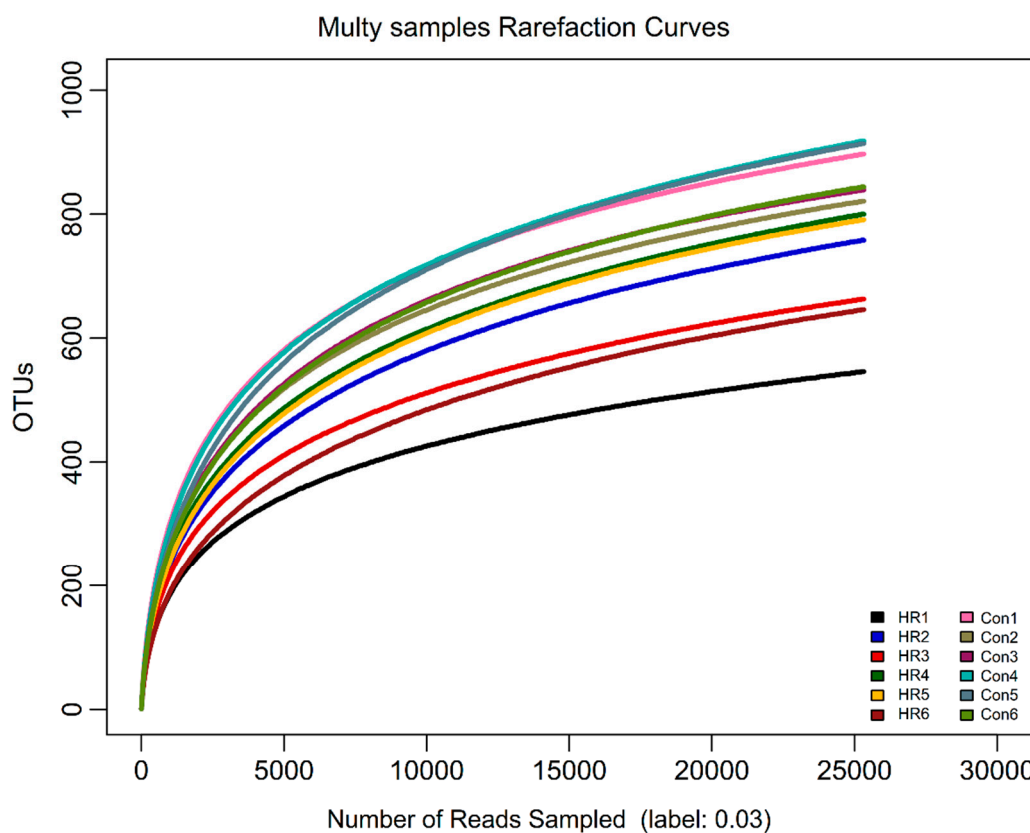

**Figure S1:** Rarefaction curve for each sample (Con1-Con6, HR1-HR6 are colonic samples of goats fed with 55% or 90% concentrate, separately).
